# Supplementary material
Source: publisher figshare collection journal article supplement (https://gsajournals.figshare.com/ndownloader/files/24667895)
Supplement: Supplementary file 1 [file 24667895]

## Sheet: Legend
Table S1: Number of cells for each class of the BBBC021 dataset included in the analysis, classification accuracy for each class, and the effect of training set size on classification accuracy
cell_number_and_accuracy
Excluded border cells	number of all segmented cells (excluding cells touching the border of the image) and classification accuracy for each class
Excluded border and bad cells	number of cells after filtering out bad cells and classification accuracy for each class
training_set_sizes
Effect of training set size on classification accuracy. Three independent runs were performed for training sets comprised of 50 to 1000 cells per class.
NOTE: classes ‘DNA replication’ (dataset: Excluded border cells), and ‘DNA replication’ and ‘Microtubule stabilizers’ (dataset: Excluded border and bad cells) had less than 1000 cells included in the analysis when testing the largest training set size (see tab ‘Number of cells for each class’ for exact cell numbers).

## Sheet: cell_number_and_accuracy
	Excluded border cells		Excluded border cells and bad cells
Class	cell number	classification accuracy	cell number	classification accuracy
Actin disruptors	1895	91	1875	92
Aurora kinase inhibitors	1926	82	1715	91
Cholesterol-lowering	1373	73	1156	84
DMSO	3065	88	3032	89
DNA damage	1796	85	1631	93
DNA replication	969	89	921	94
Eg5 inhibitors	1215	80	1063	86
Epithelial	2194	81	1945	92
Kinase inhibitors	2064	96	2019	97
Microtubule destabilizers	2311	82	2279	84
Microtubule stabilizers	1006	92	996	94
Protein degradation	1388	79	1240	86
Protein synthesis	1327	83	1183	89
Total	22529	85	21055	90

## Sheet: training_set_sizes
	Excluded border cells			Excluded border cells and bad cells
Train set size	run1	run2	run3	run1	run2	run3
50	25.85	58.77	7.69	60.15	59.69	18.46
100	65.69	64.54	55.92	72	70.85	70.69
200	69.96	71.31	70.5	77.42	76.42	75.38
300	73.64	74.36	74.77	80.85	79.13	79.33
400	77.02	75.92	75.71	83.35	81.46	81.46
500	77.62	78.06	77.66	83.38	83.92	83.12
750	80.05	80.48	79.91	85.89	86.01	86.21
1000	81.66	82.2	81.44	87.79	87.48	87.06
all available	84.83	84.98	85.01	89.69	89.86	90.04
